# Supplementary material
Source: publisher figshare collection journal article supplement (https://acs.figshare.com/ndownloader/files/14072393)
Supplement: Supplementary file 1 [file 14072393]

## Supporting Information

# **Multifunctional Vitrimer-Like Polydimethylsiloxane (PDMS): Recyclable, Self-Healable and Water-Driven Malleable Covalent Networks Based on Dynamic Imine Bond**

Zhanbin Feng<sup>1</sup>, Bing Yu<sup>1,2,3</sup>, Jing Hu<sup>1</sup>, Hongli Zuo<sup>1</sup>, Jianping Li<sup>1</sup>, Haibin Sun<sup>1</sup>, Nanying Ning<sup>1,2,3\*</sup>, Ming Tian<sup>1,2,3\*</sup> and Liquun Zhang<sup>1,2,3</sup>

1. State Key Laboratory of Organic-Inorganic Composites, Beijing University of Chemical Technology, Beijing 100029, China;
2. Beijing Advanced Innovation Center for Soft Matter Science and Engineering, Beijing University of Chemical Technology, Beijing 100029, China;
3. Key Laboratory of Carbon Fiber and Functional Polymers, Ministry of Education, Beijing University of Chemical Technology, Beijing 100029, China.

---

\* Corresponding authors. Tel.: 86 10 64456158; Fax: 86 10 64433964.

E-mail addresses: [tianm@mail.buct.edu.cn](mailto:tianm@mail.buct.edu.cn) (M. Tian); [ningny@mail.buct.edu.cn](mailto:ningny@mail.buct.edu.cn) (N. Ning)

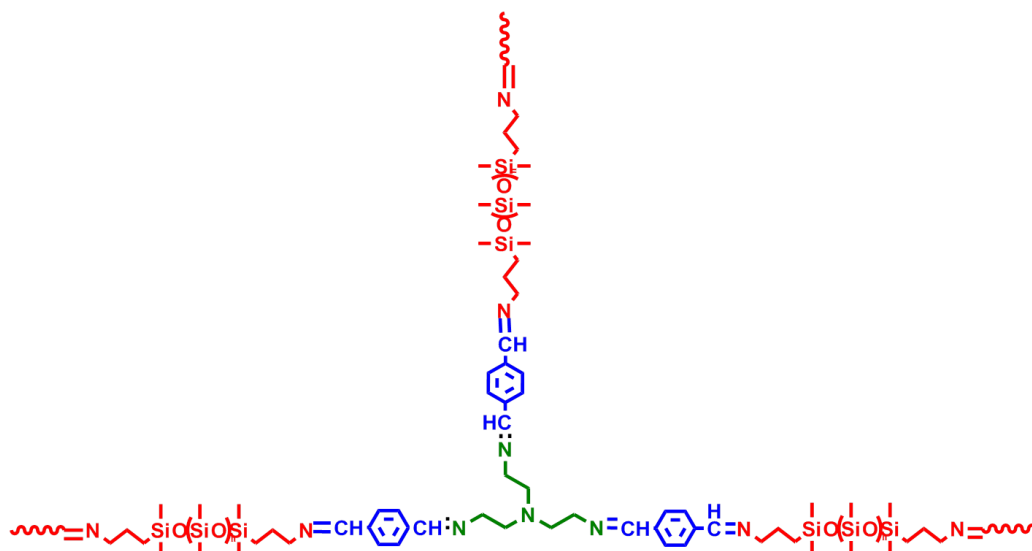

**Scheme S1.** The structure of the V-PDMS-NH<sub>2</sub>

**Table S1** Recipe for different samples of the crosslinked vitrimer-like PDMS

| Sample                    | Molar Ratio                |                              |                                |
|---------------------------|----------------------------|------------------------------|--------------------------------|
|                           | Terephthalaldehyde<br>(A2) | PDMS-NH <sub>2</sub><br>(B2) | Tri(2-aminoethyl)amine<br>(B3) |
| V-PDMS-NH <sub>2</sub> -3 | 10                         | 5.5                          | 3                              |
| V-PDMS-NH <sub>2</sub> -4 | 10                         | 4                            | 4                              |
| V-PDMS-NH <sub>2</sub> -5 | 10                         | 2.5                          | 5                              |

**The measurement of swelling ratio (SR) and gel fraction (GF).** Swelling experiments of the crosslinked PDMS elastomer ( $W_1$ ) were performed by immersing in toluene for 3 days to reach the swelling equilibrium ( $W_2$ ). The swelling process was under stirring and the solvent was replaced every 12 h. Subsequently, the swollen samples were dried at 60 °C in a vacuum oven until a constant weight ( $W_3$ ). Hence, swelling ratio ( $SR$ ) and gel fraction ( $GF$ ) are calculated on the basis of the Equations (1) and (2)

$$SR = \frac{W_2 - W_3}{W_3} \quad (1)$$

$$GF = \frac{W_3}{W_1} \quad (2)$$

### **Small molecule model study for dynamic reversible reaction**

In order to demonstrate the behavior of the dynamic reversible reaction, a small molecule model study was carried out. Two kinds of molecule ‘AA’ and ‘BB’ with symmetrical structure were designed and the experiment process was as follow.

**(1) Synthesis of molecule ‘AA’.**<sup>1</sup> Aniline (24.0 mmol, 1.83 ml) was added dropwise to a solution of terephthalaldehyde (10.0 mmol, 1.34 g) in DCM (40 ml). The reaction mixture was stirred for 20 h at room temperature. After by-product water was removed by MgSO<sub>4</sub> from the mixture, the dimer was purified by recrystallization from a dichloromethane/hexane solution.

**(2) Synthesis of molecule ‘BB’.**<sup>2</sup> Terephthalaldehyde (0.2 g, 1.461 mmol) and butan-1-amine (0.289 mL, 2.95 mmol) were dissolved in toluene (10 mL) and allowed to stir at room temperature for 2 h. The resulting solution was then concentrated under reduced pressure to afford the product as yellow oil.

**(3) Synthesis of molecule ‘AB’.**<sup>3</sup> “AA”(0.5g, 1.76 mmol) and “BB”(0.43g, 1.76 mmol) dissolved in methylbenzene (10ml) were mixed in a 50 mL three-necked flask equipped with a reflux condenser and stirred at 80 °C for 12 h with nitrogen protection. The methylbenzene was removed by reduced pressure distillation at 60 °C, and the product was collected and monitored by <sup>1</sup>H-NMR spectroscopy.

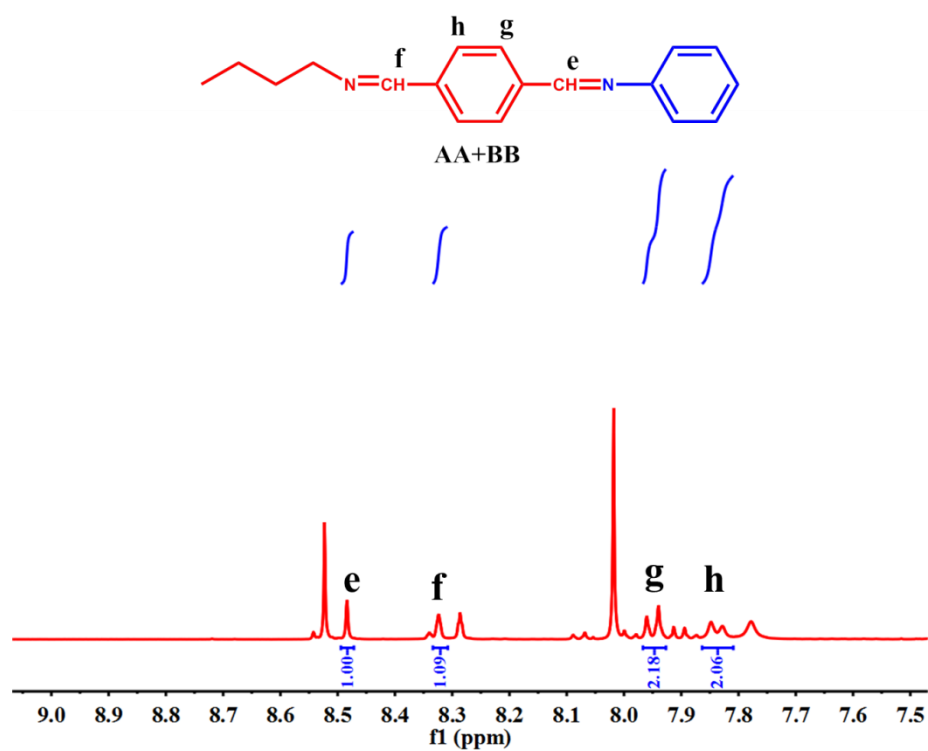

**Figure S1.** The <sup>1</sup>H-NMR spectrum of model compound (AA+BB) with integrals.

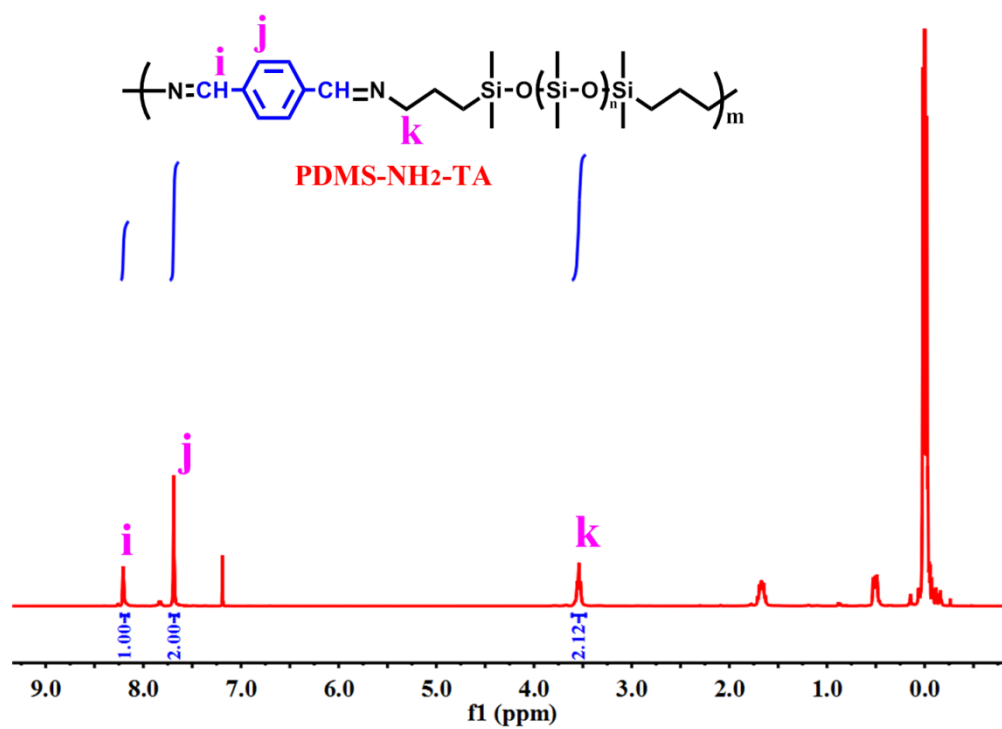

**Figure S2.** The <sup>1</sup>H-NMR spectrum of PDMS-NH<sub>2</sub>-TA with integrals.

### The de-crosslinking of the film with the addition of phenylamine

About 1g film, 1.5g phenylamine (the excess phenylamine was used to make sure the exchange reaction finished completely, **Figure S3**) and 20 mL DMF were put into a 50 mL three-necked flask equipped with a reflux condenser and stirred at 140 °C for 6 h with nitrogen protection.

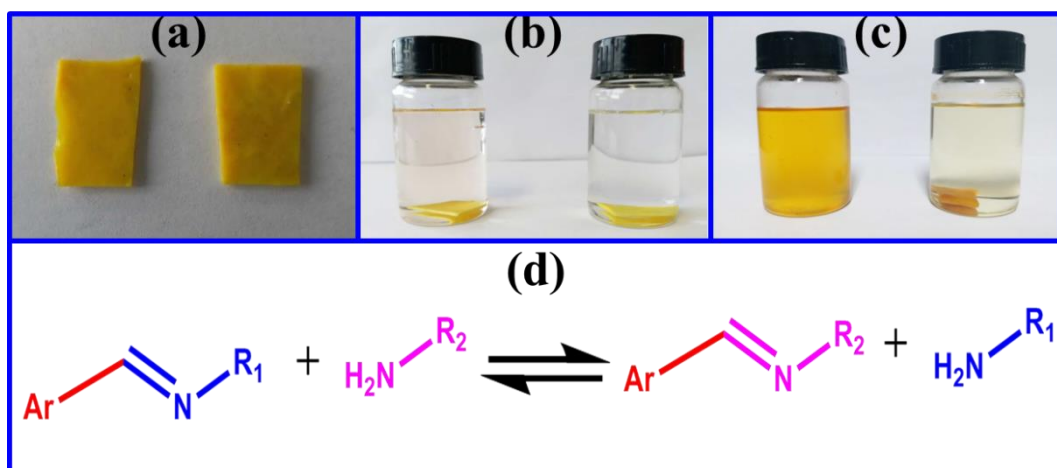

**Figure S3.** (a) The samples of V-PDMS-NH<sub>2</sub>-4 which was cut into two halves; (b) the two halves were put into the solution of DMF and phenylamine (left) or into DMF (right), respectively; (c) treated at 140 °C for 6h; (d) the exchange reaction of imine bonds.

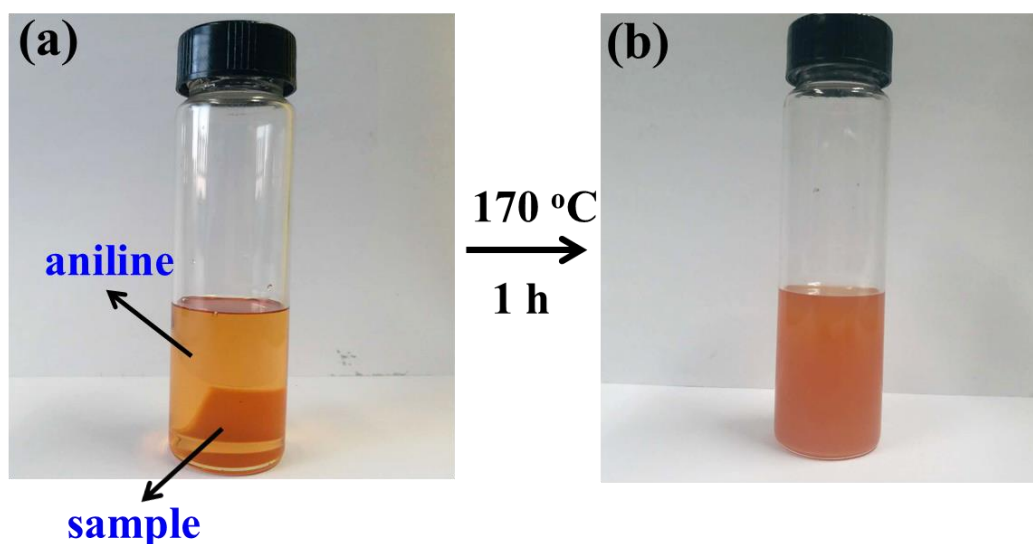

**Figure S4.** (a) the sample was put into the phenylamine; (b) treated at 170 °C for 1h.

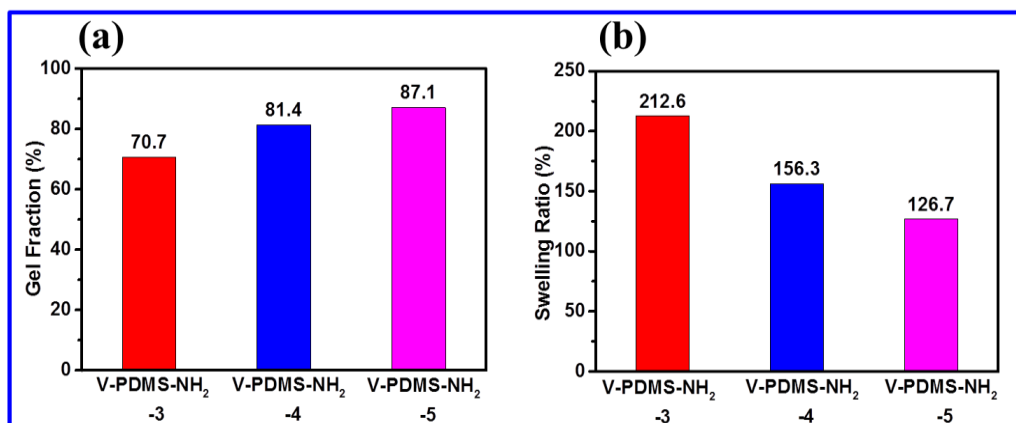

**Figure S5.** The gel fraction (a) and swelling ratio (b) of the PDMS-like vitrimers with the different composition.

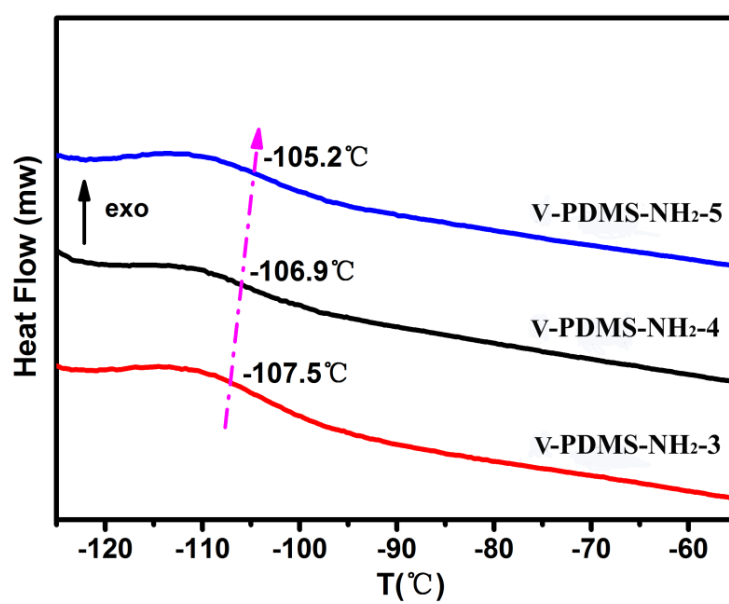

**Figure S6.** DSC curves of V-PDMS-NH<sub>2</sub>

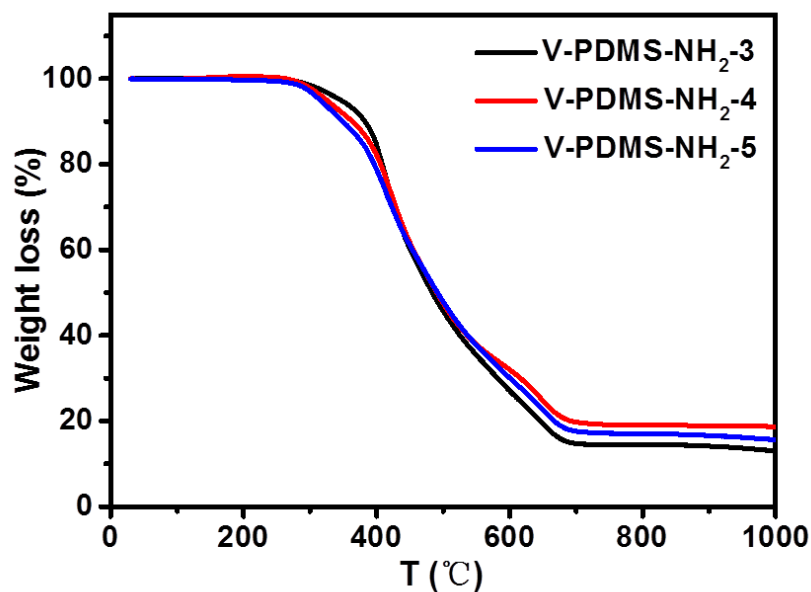

**Figure S7.** TGA curves of V-PDMS-NH<sub>2</sub>.

**Table S2.** Summary of the activation energy ( $E_a$ ) and relaxation time at 130 °C for vitrimer-like PDMS, vinylogous urethane vitrimer <sup>4#a</sup> and PDMS-Zn(Ac)<sub>2</sub> <sup>5#b</sup>

| Sample                                    | $E_a$ (kJ/mol) | Relaxation time at 130 °C (s) |
|-------------------------------------------|----------------|-------------------------------|
| vitrimer-like PDMS                        | 23.5           | 64                            |
| Vinylogous urethane vitrimer <sup>4</sup> | 60             | 550                           |
| PDMS-Zn(Ac) <sub>2</sub> <sup>5</sup>     | 74             | >1000                         |

#a: Reprinted with permission from Adv. Funct. Mater. 2015, 25, 2451-2457. Copyright 2015, John Wiley & Sons.

#b: Reprinted with permission from Scientific reports 2017, 7, 11833. Copyright 2017, Nature Publishing Group.

**Table S3.** Summary of self-healing efficiency for vitrimer-like PDMS, PA-SH vitrimer <sup>6#c</sup>, PS- alkoxyamines vitrimer <sup>7#d</sup> and epoxy resins-disulfide links <sup>8#e</sup>

| Sample                                    | Self-healing efficiency (%)    |
|-------------------------------------------|--------------------------------|
| vitrimer-like PDMS                        | 93 (10min)                     |
| PA-SH vitrimer <sup>6</sup>               | 29.4 (10min), 66.8 (1h)        |
| PS-alkoxyamines vitrimer <sup>7</sup>     | 75.9 (2.5h)                    |
| Epoxy resins-disulfide links <sup>8</sup> | 54 (15min), 63 (0.5h), 92 (1h) |

#c: Reprinted with permission from *J. Mater. Chem. A* **2015**, 3, 19662-19668. Copyright 2015, Royal Society of Chemistry.

#d: Reprinted with permission from *Chem. Mater.* **2011**, 23, 5076- 5081. Copyright 2011, American Chemical Society.

#e: Reprinted with permission from *Macromolecules* **2011**, 44, 2536- 2541. Copyright 2011, American Chemical Society.

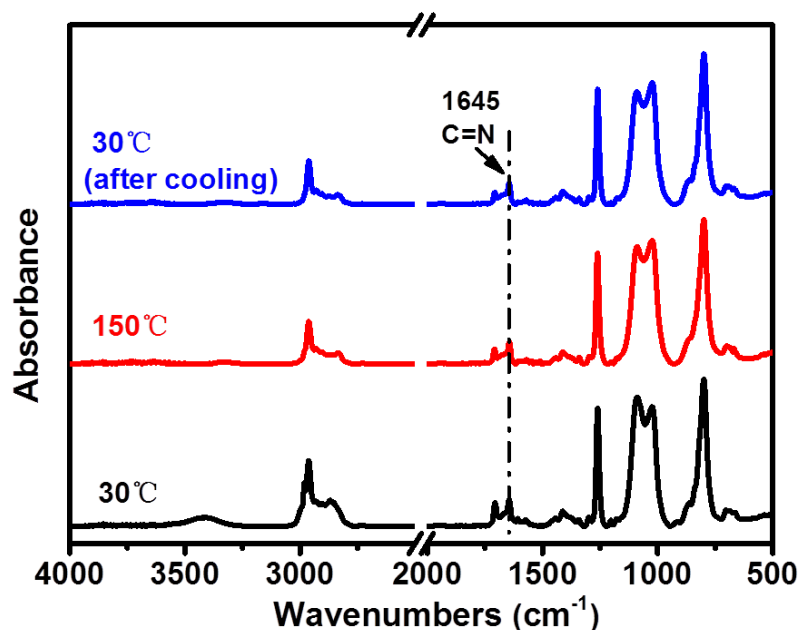

**Figure S8.** The in-situ IR spectra of PDMS-NH<sub>2</sub> and TA mixture at 30 °C, 170 °C and cooled to 30 °C, respectively.



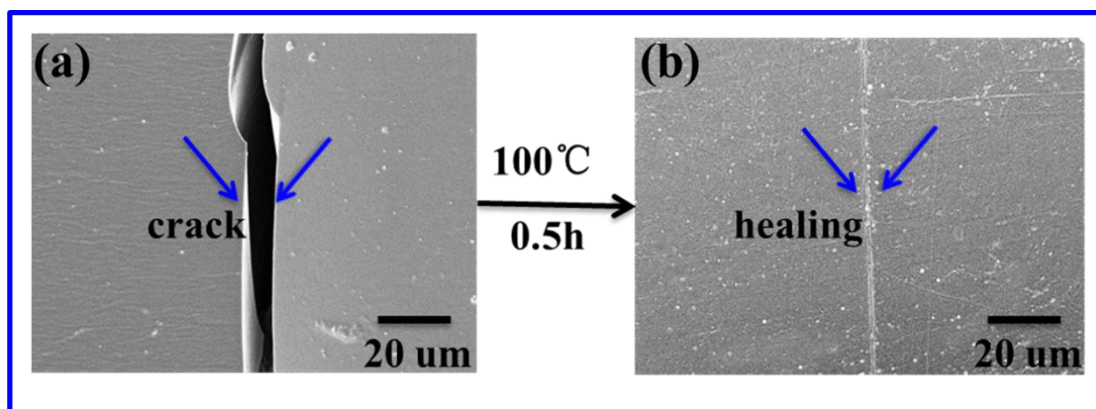

**Figure S9.** SEM images of the third recycled vitrimer-like PDMS after being self-healed for 30 min at 100 °C. Taking the sample of V-PDMS-NH<sub>2</sub>-4 for example.

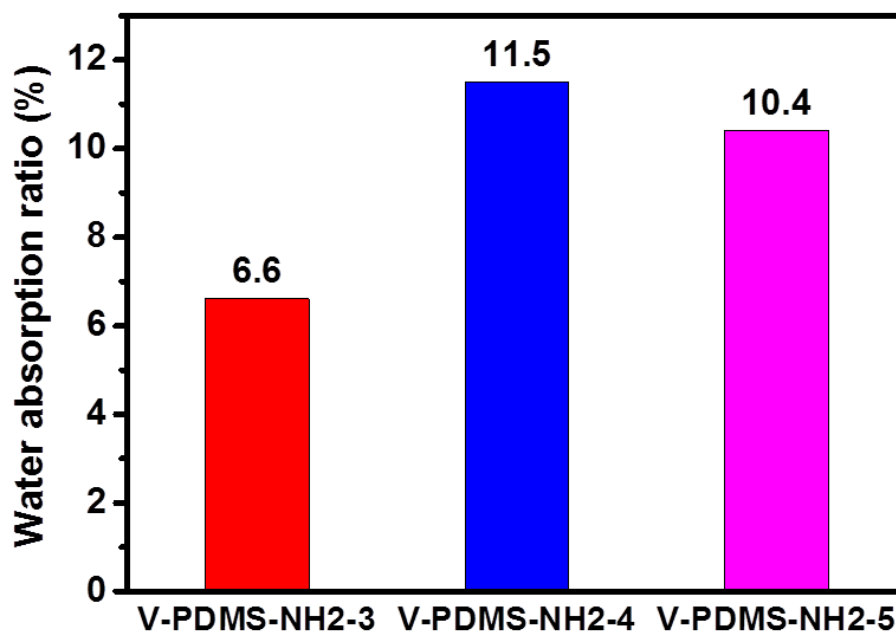

**Figure S10.** Water absorption ratio of vitrimer-like PDMS after immersing in water for 24 h.

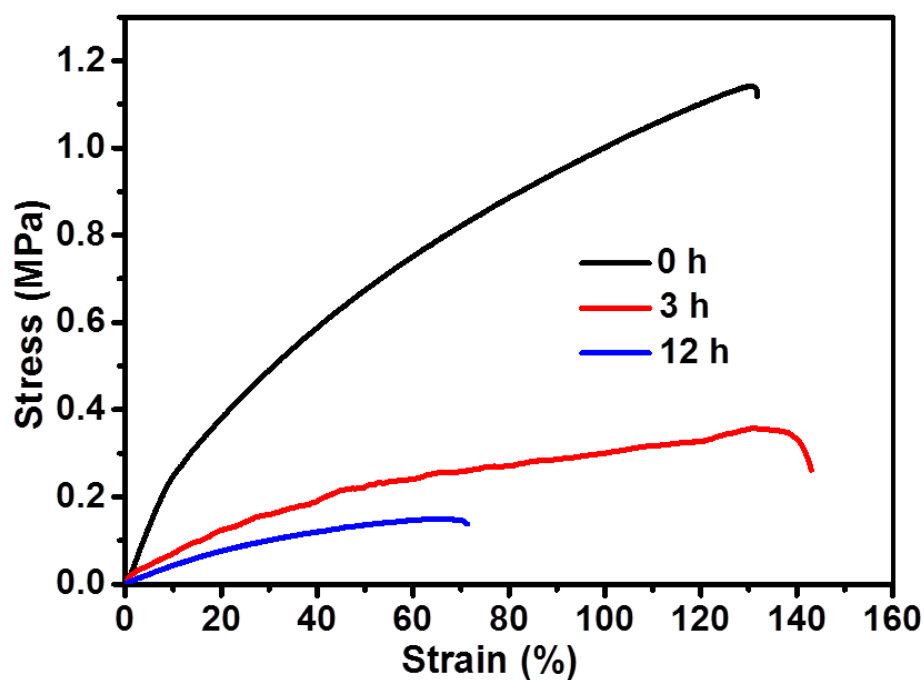

**Figure S11.** Stress-strain curve of vitrimer-like PDMS with different water adsorption time (0 h, 3 h, and 12 h) and the water adsorption ratio was 0 %, 5.1% and 9.6%, respectively.

## References

- (1) Kamura, M.; Kuzumoto, Y.; Aomori, S.; Houjou, H.; Kitamura, M.; Arakawa, Y. Synthesis and investigation of  $\pi$ -conjugated azomethine self-assembled multilayers by layer-by-layer growth. *Thin Solid Films* **2010**, *518*, 5115-5120.
- (2) Sanna, E.; Escudero-Adán, E. C.; López, C.; Ballester, P.; Rotger, C.; Costa, A. Macrocyclic Tetraamines: Synthesis and Reversible Uptake of Diethyl Phthalate by a Porous Macrocycle. *J. Org. Chem.* **2016**, *81*, 5173 -5180.
- (3) Li, H.; Bai, J.; Shi, Z. X.; Yin, J. Environmental friendly polymers based on schiff-base reaction with self-healing, remolding and degradable ability. *Polymer* **2016**, *85*, 106 -113.
- (4) Denissen, W.; Rivero, G.; Nicolaÿ, R.; Leibler, L.; Winne, J. M.; Du Prez, F. E. Vinylogous urethane vitrimers. *Adv. Funct. Mater.* **2015**, *25*, 2451-2457.
- (5) Zhang, H.; Cai, C.; Liu, W. X.; Li, D. D.; Zhang, J. W.; Zhao, N.; Xu, J. Recyclable

Polydimethylsiloxane Network Crosslinked by Dynamic Transesterification Reaction. *Scientific reports* **2017**, 7, 11833.

(6) Lei, Z. Q.; Xie, P.; Rong, M. Z.; Zhang, M. Q. Catalyst-free dynamic exchange of aromatic Schiff base bonds and its application to self-healing and remolding of crosslinked polymers. *J. Mater. Chem. A* **2015**, 3, 19662-19668.

(7) Yuan, C.; Rong, M. Z.; Zhang, M. Q.; Zhang, Z. P.; Yuan, Y. C. Self-healing of polymers via synchronous covalent bond fission/radical recombination. *Chem. Mater.* **2011**, 23, 5076-5081.

(8) Canadell, J.; Goossens, H.; Klumperman, B. Self-healing materials based on disulfide links. *Macromolecules* **2011**, 44, 2536- 2541.
